# Supplementary material for: Ex Vivo Cardiotoxicity of Antineoplastic Casiopeinas Is Mediated through Energetic Dysfunction and Triggered Mitochondrial‐Dependent Apoptosis
Source: Hindawi journal article supplement (doi:10.1155/2018/8949450), 2018-01-01

Supplemental figure 2

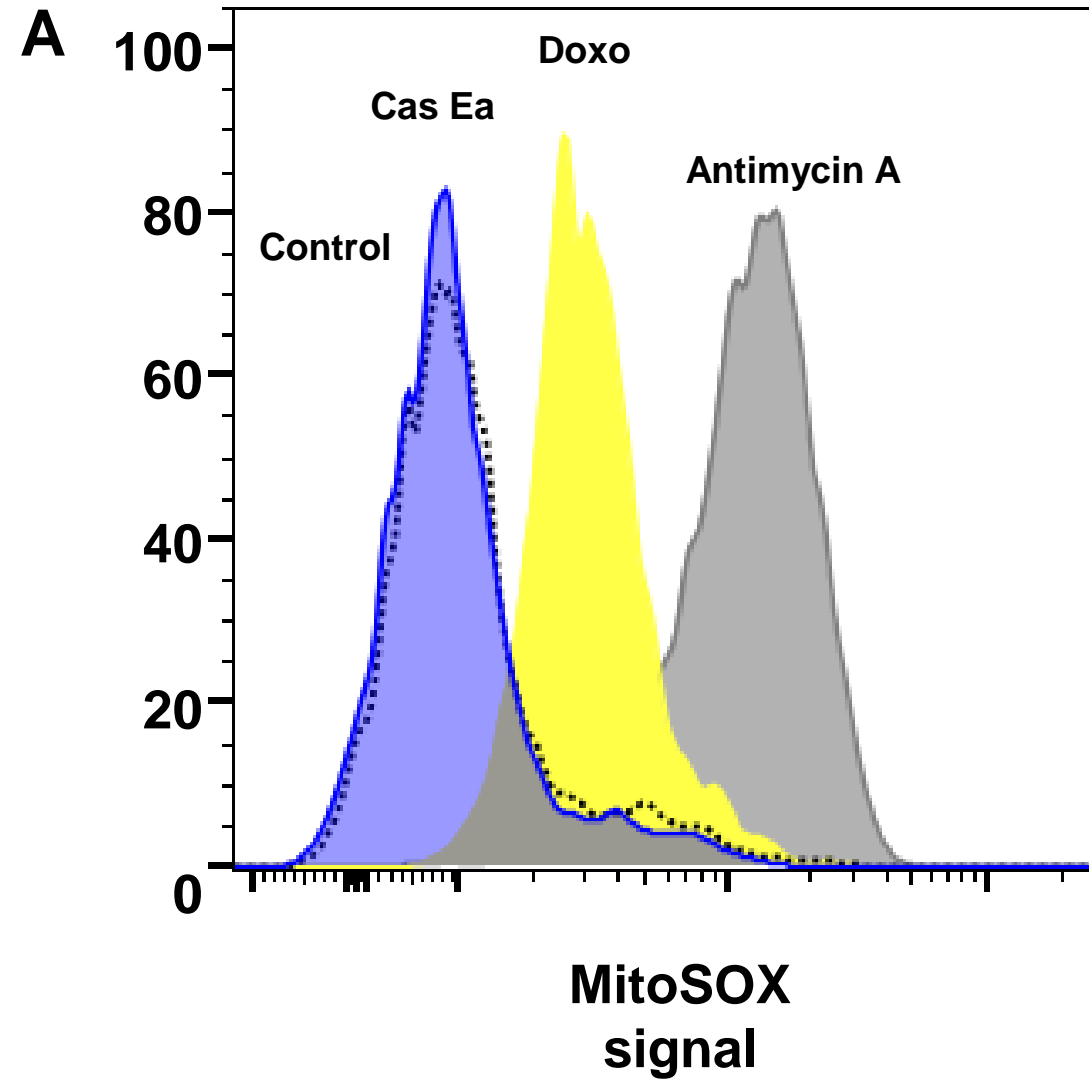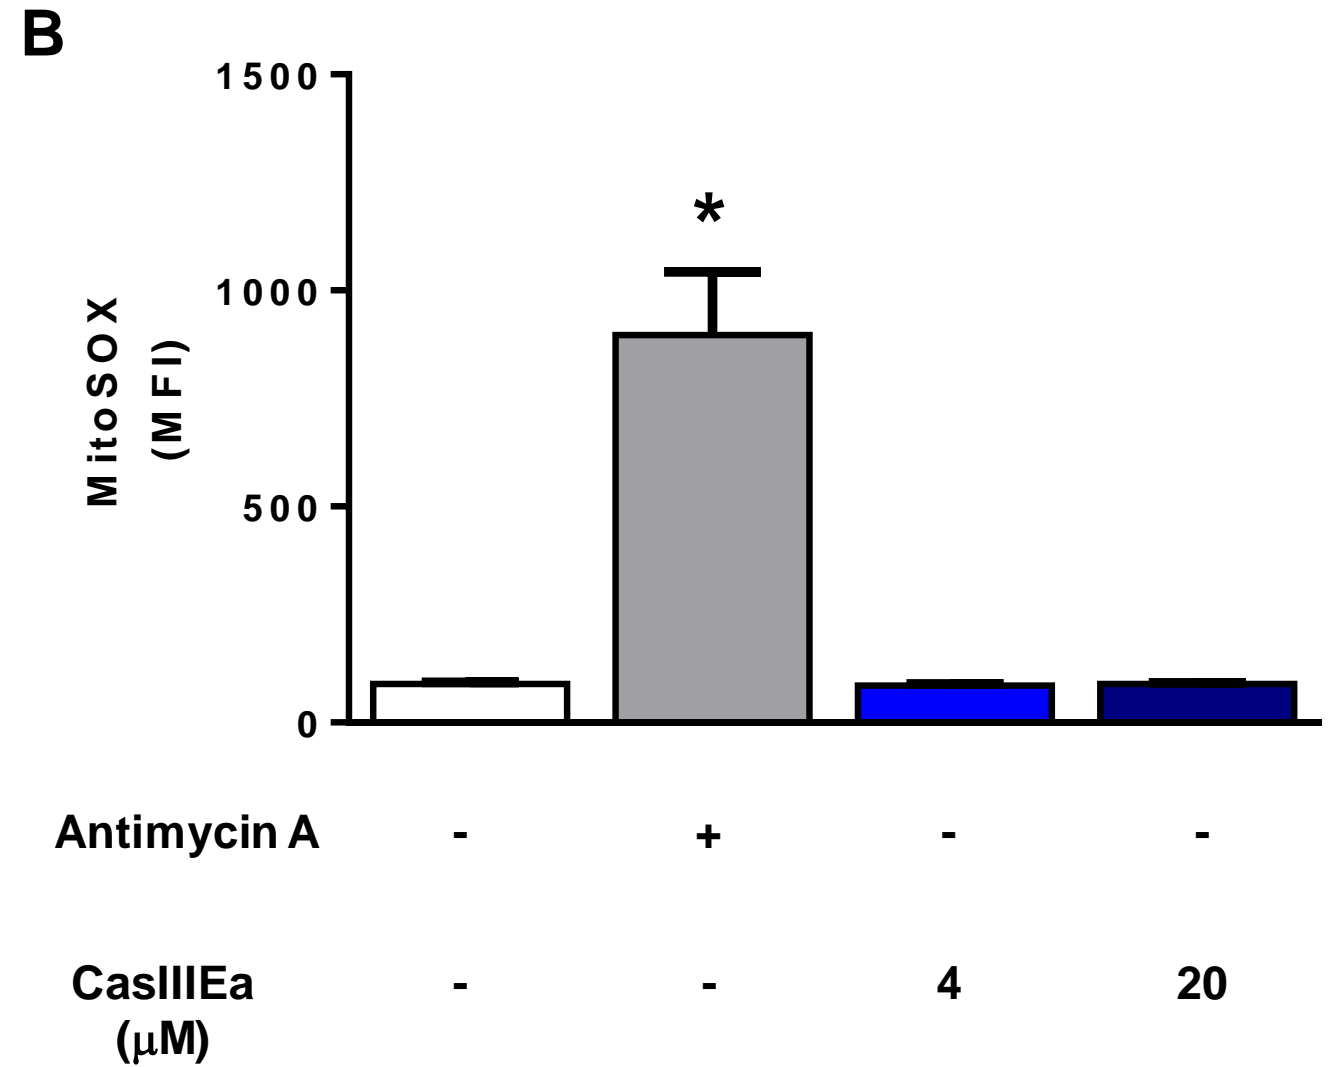

Supplement: f2 [file 8949450.f2.pdf]
